# Supplementary material
Source: PubMed Central journal article supplement (PMC3376414)
Supplement: NIHMS384097-supplement-SI.pdf [file NIHMS384097-supplement-SI.pdf]

# Supporting Information

## Visual Detection of Cysteine and Homocysteine

*Oleksandr Rusin,<sup>†</sup> Nadia N. St. Luce,<sup>†</sup> Rezik A. Agbaria,<sup>†</sup> Jorge O. Escobedo,<sup>†</sup> Isiah M. Warner,<sup>†</sup> Fareed B. Dawan,<sup>‡</sup> Kun Lian,<sup>‡</sup> Shan Jiang<sup>†</sup> and Robert M. Strongin<sup>\*†</sup>*

*<sup>†</sup>Department of Chemistry, Louisiana State University, Baton Rouge, LA 70803*

*<sup>‡</sup>Center for Advanced Microstructures and Devices, Louisiana State University, Baton Rouge, LA 70803*

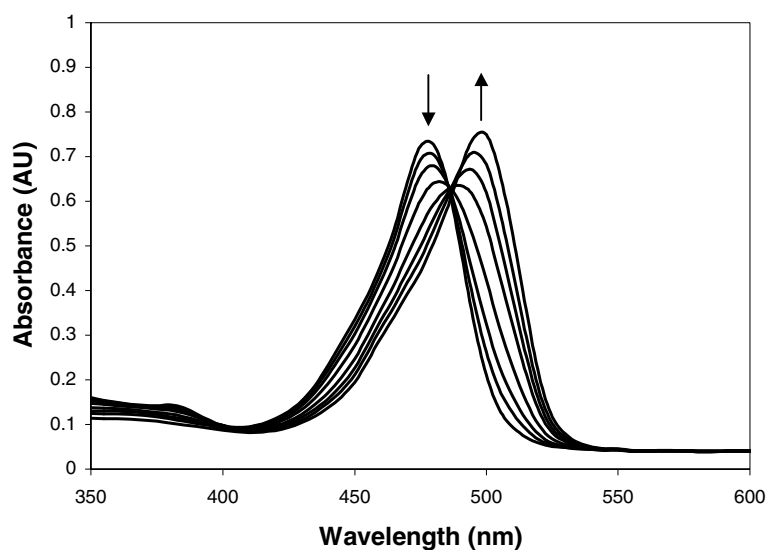

**Figure S1.** UV-Vis spectra of **1** ( $2.5 \times 10^{-6} M$ ) and L-cysteine ( $4 \times 10^{-6} M - 8 \times 10^{-5} M$ ) in  $H_2O$ , pH 9.5 at room temperature. Each spectrum was acquired after 5 min. As the concentration of L-cysteine increases, a red shift from 480 nm to 505 nm is observed.

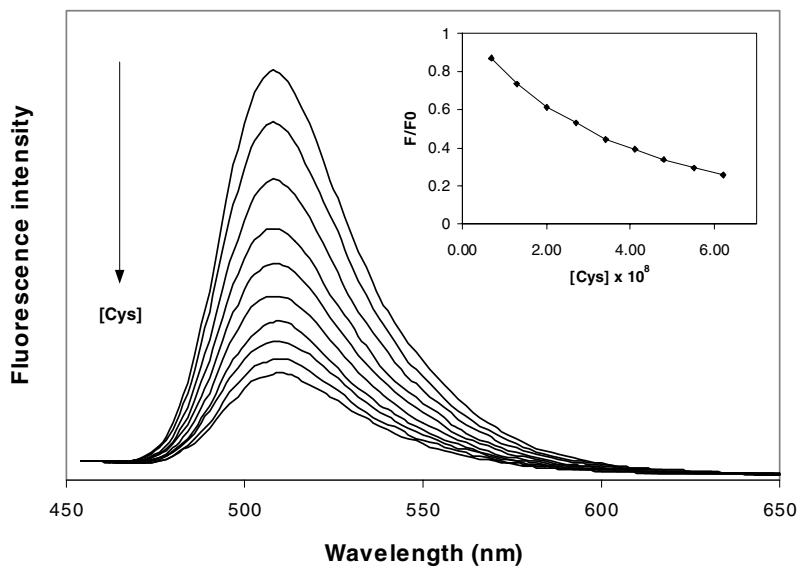

**Figure S2.** Fluorescence emission spectra of solutions of **1** ( $1.0 \times 10^{-8} M$ ) and L-cysteine excited at 460 nm in  $H_2O$ , pH 9.5 at room temperature. Inset: F0 represents the maximum fluorescence intensity in the absence of analyte and F represents the corresponding intensity in the presence of analyte.

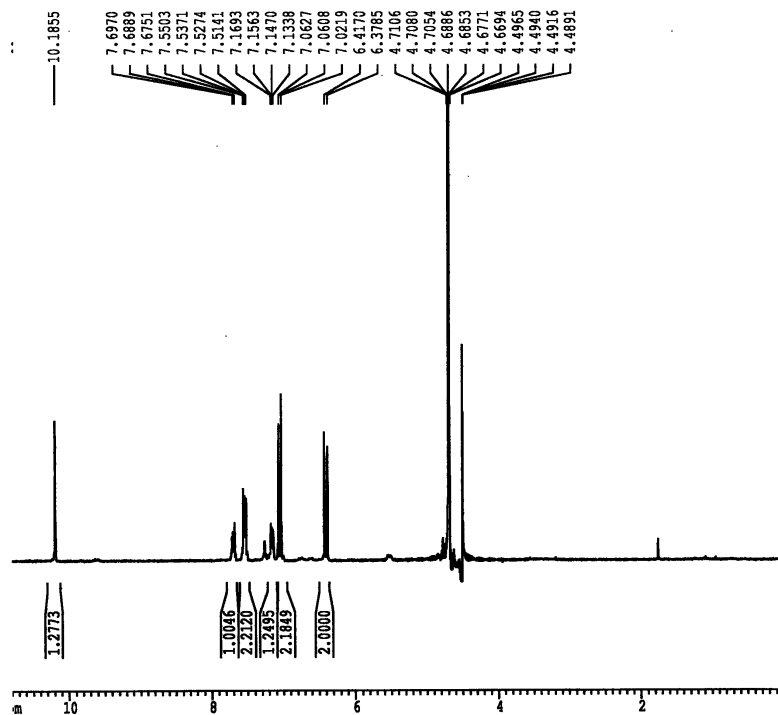

Figure S3.  $^1\text{H-NMR}$  spectrum of fluorescein dialdehyde **1** ( $\text{D}_2\text{O}$ ).

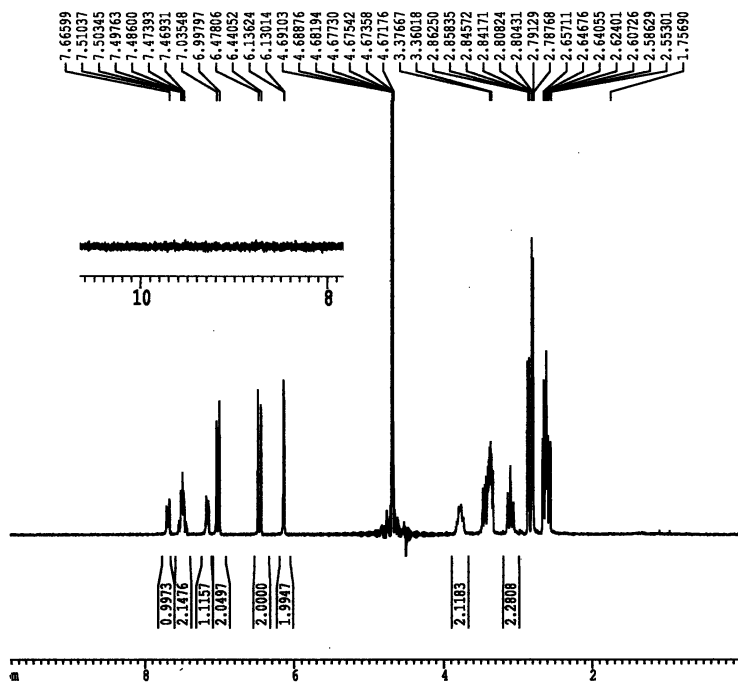

Figure S4.  $^1\text{H-NMR}$  spectrum of cysteine-derived thiazolidine **3a** ( $\text{D}_2\text{O}$ ) in the presence of excess (15 equiv) **2a** showing complete conversion to bis-thiazolidine (see also text footnote 11).

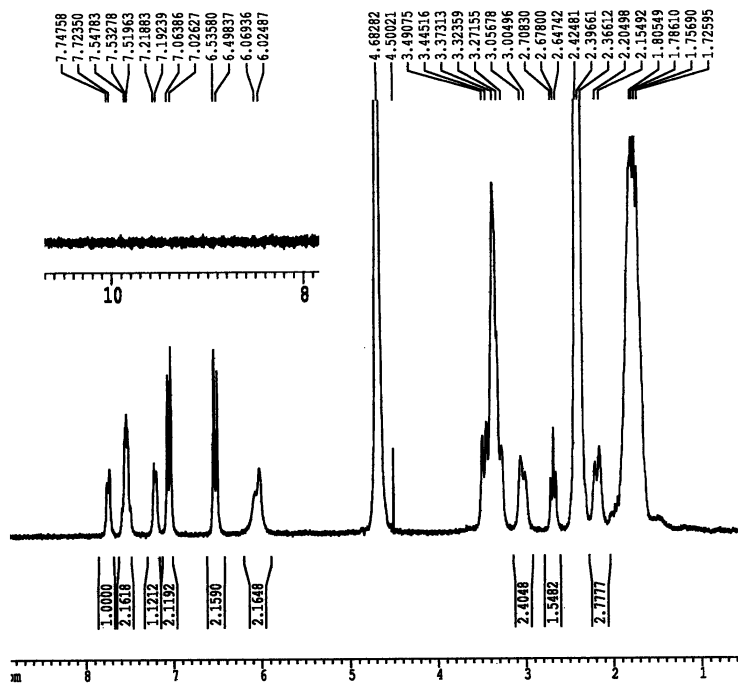

**Figure S5.** <sup>1</sup>H-NMR spectrum of homocysteine-derived thiazolidine **3b** (D<sub>2</sub>O) in the presence of excess (15 equiv) **2b** showing complete conversion to bis-thiazolidine (see also text footnote 11).

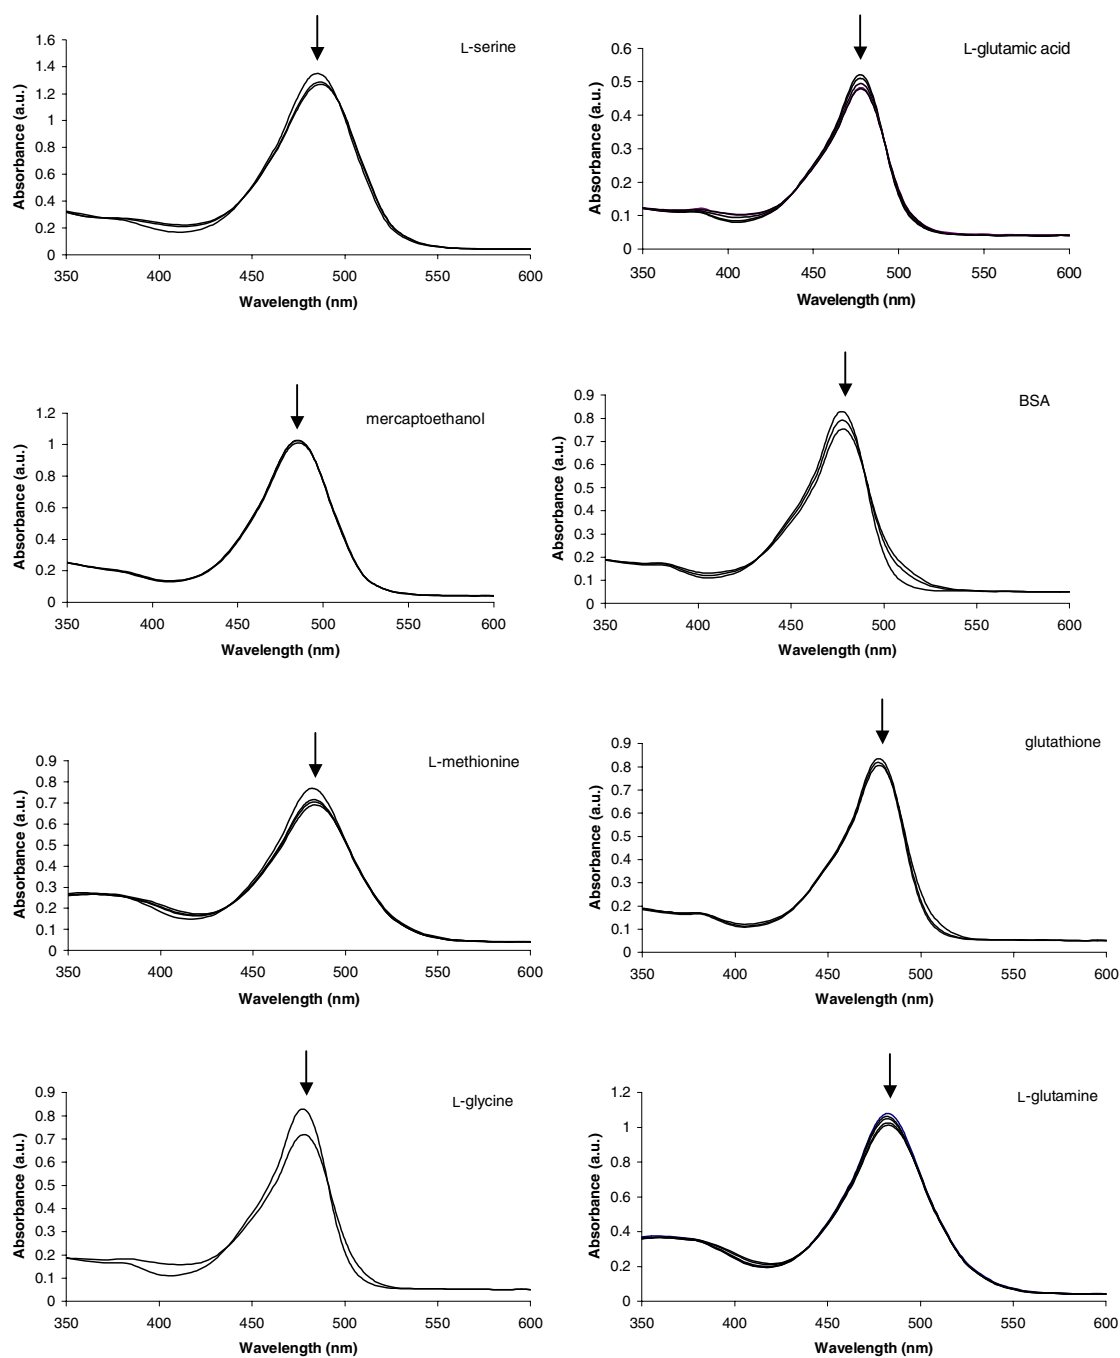

**Figure S6.** UV-Vis spectra **1** ( $2.5 \times 10^{-6}$ - $6.5 \times 10^{-6}$  M) in water and with various analytes (analyte concentrations are shown to a maximum of  $8.0 \times 10^{-4}$  M in 0.1 M carbonate buffer pH 9.5). These results indicate that even at an order of magnitude higher final concentrations than cysteine ( $8.0 \times 10^{-5}$  M), these analytes promote significantly weaker absorbance changes in solutions of **1** (compare to Figure S1).
